# Supplementary material
Source: PubMed Central journal article supplement (PMC8485734)
Supplement: ckab012_supplementary_data.pdf [file ckab012_supplementary_data.pdf]

**Table A1: Life expectancy (LE) by frailty state in women and men by 5-year age group in the Total SHARE population<sup>a</sup> in 2004-05 (wave 1) and 2015 (wave 6)**

|                | Age at start of the interval | N    | Total Life Expectancy | Non-Frail        |                            | Pre-Frail     |                            | Frail         |                            |
|----------------|------------------------------|------|-----------------------|------------------|----------------------------|---------------|----------------------------|---------------|----------------------------|
|                |                              |      |                       | LE (95% CI)      | % of total life expectancy | LE (95% CI)   | % of total life expectancy | LE (95% CI)   | % of total life expectancy |
| <b>2004-05</b> | <b>50</b>                    | 4057 | 31.9                  | 22.8 (22.6-23.0) | 71.5 (70.8-72.1)           | 5.7 (5.5-5.9) | 17.8 (17.3-18.4)           | 3.4 (3.3-3.6) | 10.7 (10.2-11.2)           |
|                | <b>55</b>                    | 4102 | 27.5                  | 18.8 (18.6-19.0) | 68.3 (67.6-69.1)           | 5.3 (5.1-5.5) | 19.3 (18.7-20.0)           | 3.4 (3.2-3.5) | 12.3 (11.8-12.9)           |
|                | <b>60</b>                    | 3716 | 23.2                  | 15.0 (14.8-15.2) | 64.7 (63.9-65.6)           | 4.8 (4.7-5.0) | 20.9 (20.1-21.7)           | 3.3 (3.2-3.5) | 14.4 (13.7-15.1)           |
|                | <b>65</b>                    | 3345 | 19.1                  | 11.4 (11.2-11.6) | 59.7 (58.7-60.7)           | 4.4 (4.3-4.6) | 23.2 (22.3-24.2)           | 3.3 (3.1-3.4) | 17.1 (16.2-17.9)           |
|                | <b>70</b>                    | 2726 | 15.3                  | 8.1 (7.9-8.3)    | 52.8 (51.5-54.1)           | 4.0 (3.8-4.2) | 26.4 (25.2-27.6)           | 3.2 (3.0-3.4) | 20.9 (19.7-22.0)           |
|                | <b>75</b>                    | 2000 | 11.8                  | 5.4 (5.2-5.6)    | 46.0 (44.3-47.7)           | 3.4 (3.2-3.6) | 28.7 (27.1-30.3)           | 3.0 (2.8-3.2) | 25.4 (23.8-26.9)           |
|                | <b>80</b>                    | 1183 | 8.7                   | 3.2 (3.0-3.4)    | 37.3 (34.9-39.7)           | 2.7 (2.5-2.9) | 31.0 (28.7-33.4)           | 2.7 (2.5-3.0) | 31.7 (29.3-34.0)           |
|                | <b>85+</b>                   | 569  | 6.2                   | 2.1 (1.8-2.3)    | 33.4 (29.5-37.3)           | 2.1 (1.8-2.3) | 33.0 (29.1-36.9)           | 2.1 (1.9-2.3) | 33.6 (29.7-37.5)           |
| <b>2015</b>    | <b>50</b>                    | 3896 | 33.3                  | 24.0 (23.8-24.1) | 72.1 (71.7-72.6)           | 5.9 (5.7-6.0) | 17.7 (17.3-18.1)           | 3.4 (3.3-3.5) | 10.2 (9.9-10.5)            |
|                | <b>55</b>                    | 6090 | 28.8                  | 20.0 (19.9-20.2) | 69.6 (69.2-70.1)           | 5.4 (5.3-5.5) | 18.7 (18.3-19.2)           | 3.3 (3.2-3.5) | 11.6 (11.3-12.0)           |
|                | <b>60</b>                    | 7046 | 24.4                  | 16.2 (16.0-16.3) | 66.1 (65.6-66.7)           | 5.0 (4.9-5.1) | 20.5 (20.0-21.0)           | 3.3 (3.2-3.4) | 13.4 (13.0-13.8)           |
|                | <b>65</b>                    | 7029 | 20.3                  | 12.5 (12.4-12.6) | 61.5 (60.9-62.2)           | 4.6 (4.5-4.7) | 22.5 (21.9-23.1)           | 3.2 (3.1-3.4) | 15.9 (15.4-16.5)           |
|                | <b>70</b>                    | 5585 | 16.4                  | 9.2 (9.0-9.3)    | 55.7 (54.9-56.5)           | 4.1 (4.0-4.2) | 24.9 (24.1-25.6)           | 3.2 (3.1-3.3) | 19.4 (18.7-20.1)           |
|                | <b>75</b>                    | 4430 | 12.7                  | 6.2 (6.0-6.3)    | 48.5 (47.5-49.6)           | 3.4 (3.3-3.6) | 27.1 (26.1-28.1)           | 3.1 (3.0-3.2) | 24.4 (23.4-25.3)           |
|                | <b>80</b>                    | 2846 | 9.4                   | 3.7 (3.6-3.8)    | 39.5 (38.1-40.9)           | 2.8 (2.7-2.9) | 29.9 (28.6-31.3)           | 2.9 (2.7-3.0) | 30.5 (29.2-31.9)           |
|                | <b>85+</b>                   | 1937 | 6.7                   | 2.2 (2.0-2.3)    | 32.4 (30.3-34.4)           | 2.1 (2.0-2.3) | 31.7 (29.7-33.8)           | 2.4 (2.3-2.5) | 35.9 (33.8-38.0)           |

<sup>a</sup> Denmark, Sweden, Austria, Germany, France, Switzerland, Belgium, Italy, Spain and Greece.

**Table A2: Life expectancy (LE) by frailty state in women and men by 5-year age group in the Northern SHARE population<sup>a</sup> in 2004-05 (wave 1) and 2015 (Wave 6)**

|                | Age at start of the interval | N    | Total Life Expectancy | Non-Frail        |                            | Pre-Frail     |                            | Frail         |                            |
|----------------|------------------------------|------|-----------------------|------------------|----------------------------|---------------|----------------------------|---------------|----------------------------|
|                |                              |      |                       | LE (95% CI)      | % of total life expectancy | LE (95% CI)   | % of total life expectancy | LE (95% CI)   | % of total life expectancy |
| <b>2004-05</b> | <b>50</b>                    | 775  | 31.3                  | 25.3 (24.9-25.7) | 80.7 (79.5-82.0)           | 4.2 (3.8-4.5) | 13.4 (12.3-14.5)           | 1.8 (1.6-2.1) | 5.8 (5.0-6.7)              |
|                | <b>55</b>                    | 870  | 26.8                  | 21.0 (20.6-21.4) | 78.3 (76.8-79.7)           | 4.0 (3.7-4.4) | 15.0 (13.7-16.3)           | 1.8 (1.5-2.1) | 6.7 (5.8-7.7)              |
|                | <b>60</b>                    | 750  | 22.6                  | 17.1 (16.7-17.5) | 75.7 (74.0-77.4)           | 3.7 (3.4-4.1) | 16.5 (15.0-18.1)           | 1.8 (1.5-2.0) | 7.8 (6.6-8.9)              |
|                | <b>65</b>                    | 609  | 18.5                  | 13.3 (12.9-13.7) | 71.8 (69.7-73.8)           | 3.5 (3.2-3.9) | 18.9 (17.0-20.8)           | 1.7 (1.5-2.0) | 9.3 (7.9-10.8)             |
|                | <b>70</b>                    | 494  | 14.8                  | 9.8 (9.4-10.2)   | 66.0 (63.3-68.6)           | 3.3 (3.0-3.7) | 22.5 (20.0-24.9)           | 1.7 (1.4-2.0) | 11.6 (9.6-13.5)            |
|                | <b>75</b>                    | 411  | 11.5                  | 6.8 (6.3-7.2)    | 58.9 (55.4-62.5)           | 3.0 (2.6-3.4) | 26.2 (23.0-29.5)           | 1.7 (1.4-2.0) | 14.8 (12.1-17.5)           |
|                | <b>80</b>                    | 221  | 8.5                   | 4.3 (3.8-4.7)    | 50.3 (45.2-55.4)           | 2.6 (2.2-3.0) | 30.3 (25.5-35.0)           | 1.6 (1.3-2.0) | 19.4 (15.3-23.5)           |
|                | <b>85+</b>                   | 152  | 6.1                   | 2.7 (2.2-3.2)    | 43.9 (36.0-51.8)           | 2.1 (1.7-2.6) | 35.3 (27.7-42.9)           | 1.3 (0.9-1.7) | 20.8 (14.4-27.3)           |
| <b>2015</b>    | <b>50</b>                    | 677  | 33.0                  | 27.2 (26.9-27.5) | 82.5 (81.6-83.4)           | 3.8 (3.5-4.1) | 11.5 (10.7-12.3)           | 2.0 (1.8-2.2) | 6.0 (5.4-6.6)              |
|                | <b>55</b>                    | 976  | 28.4                  | 22.9 (22.6-23.1) | 80.4 (79.4-81.4)           | 3.6 (3.3-3.8) | 12.6 (11.7-13.5)           | 2.0 (1.8-2.2) | 7.0 (6.3-7.7)              |
|                | <b>60</b>                    | 1224 | 24.0                  | 18.7 (18.4-19.0) | 77.8 (76.6-78.9)           | 3.4 (3.2-3.6) | 14.1 (13.1-15.1)           | 1.9 (1.7-2.1) | 8.1 (7.3-8.9)              |
|                | <b>65</b>                    | 1434 | 19.9                  | 14.8 (14.5-15.1) | 74.5 (73.1-75.8)           | 3.1 (2.9-3.4) | 15.7 (14.5-16.9)           | 2.0 (1.8-2.2) | 9.9 (8.8-10.9)             |
|                | <b>70</b>                    | 1148 | 15.9                  | 11.1 (10.8-11.4) | 69.8 (68.1-71.6)           | 2.9 (2.6-3.1) | 18.0 (16.4-19.5)           | 1.9 (1.7-2.2) | 12.2 (10.9-13.5)           |
|                | <b>75</b>                    | 809  | 12.3                  | 7.8 (7.5-8.1)    | 63.4 (61.1-65.8)           | 2.6 (2.3-2.8) | 21.0 (18.9-23.0)           | 1.9 (1.7-2.1) | 15.6 (13.8-17.4)           |
|                | <b>80</b>                    | 500  | 9.1                   | 5.0 (4.7-5.3)    | 55.7 (52.4-59.0)           | 2.2 (1.9-2.4) | 23.9 (21.0-26.8)           | 1.9 (1.6-2.1) | 20.4 (17.7-23.2)           |
|                | <b>85+</b>                   | 377  | 6.4                   | 3.0 (2.7-3.3)    | 46.9 (41.9-52.0)           | 1.7 (1.4-2.0) | 26.7 (22.3-31.2)           | 1.7 (1.4-2.0) | 26.3 (21.9-30.8)           |

<sup>a</sup> Denmark and Sweden.

**Table A3: Life expectancy (LE) by frailty state in women and men by 5-year age group in the Central SHARE population<sup>a</sup> in 2004-05 (Wave 1) and 2015 (Wave 6)**

|                | Age at start of the interval | N    | Total Life Expectancy | Non-Frail        |                            | Pre-Frail     |                            | Frail         |                            |
|----------------|------------------------------|------|-----------------------|------------------|----------------------------|---------------|----------------------------|---------------|----------------------------|
|                |                              |      |                       | LE (95% CI)      | % of total life expectancy | LE (95% CI)   | % of total life expectancy | LE (95% CI)   | % of total life expectancy |
| <b>2004-05</b> | <b>50</b>                    | 2093 | 31.6                  | 24.2 (23.9-24.4) | 76.4 (75.5-77.2)           | 4.8 (4.5-5.0) | 15.0 (14.2-15.8)           | 2.7 (2.5-2.9) | 8.6 (7.9-9.3)              |
|                | <b>55</b>                    | 2014 | 27.3                  | 20.0 (19.8-20.3) | 73.5 (72.5-74.5)           | 4.5 (4.2-4.7) | 16.5 (15.6-17.4)           | 2.7 (2.5-2.9) | 10.0 (9.2-10.8)            |
|                | <b>60</b>                    | 1818 | 23.1                  | 16.2 (15.9-16.5) | 70.1 (68.9-71.3)           | 4.2 (3.9-4.4) | 18.1 (17.0-19.2)           | 2.7 (2.5-2.9) | 11.8 (10.8-12.7)           |
|                | <b>65</b>                    | 1705 | 19.0                  | 12.5 (12.2-12.8) | 65.6 (64.1-67.0)           | 3.9 (3.6-4.1) | 20.3 (19.0-21.7)           | 2.7 (2.5-2.9) | 14.1 (12.9-15.3)           |
|                | <b>70</b>                    | 1329 | 15.2                  | 9.0 (8.7-9.3)    | 59.0 (57.1-60.9)           | 3.6 (3.3-3.9) | 23.7 (21.9-25.4)           | 2.6 (2.4-2.9) | 17.4 (15.8-18.9)           |
|                | <b>75</b>                    | 1014 | 11.8                  | 6.1 (5.8-6.4)    | 51.7 (49.2-54.2)           | 3.1 (2.9-3.4) | 26.6 (24.3-28.9)           | 2.6 (2.3-2.8) | 21.7 (19.5-23.9)           |
|                | <b>80</b>                    | 619  | 8.7                   | 3.8 (3.5-4.1)    | 43.7 (40.0-47.3)           | 2.6 (2.3-2.9) | 29.8 (26.3-33.2)           | 2.3 (2.0-2.6) | 26.6 (23.3-29.9)           |
|                | <b>85+</b>                   | 243  | 6.2                   | 2.4 (2.0-2.8)    | 39.0 (32.8-45.1)           | 2.0 (1.6-2.3) | 31.7 (25.9-37.6)           | 1.8 (1.5-2.2) | 29.3 (23.6-35.0)           |
| <b>2015</b>    | <b>50</b>                    | 1920 | 32.9                  | 24.8 (24.6-25.0) | 75.2 (74.6-75.8)           | 5.3 (5.1-5.5) | 16.1 (15.5-16.6)           | 2.9 (2.7-3.0) | 8.7 (8.2-9.1)              |
|                | <b>55</b>                    | 3035 | 28.4                  | 20.7 (20.5-20.9) | 72.7 (72.1-73.4)           | 4.9 (4.8-5.1) | 17.3 (16.7-17.9)           | 2.8 (2.7-3.0) | 9.9 (9.4-10.4)             |
|                | <b>60</b>                    | 3360 | 24.2                  | 16.9 (16.7-17.1) | 69.8 (69.0-70.6)           | 4.6 (4.4-4.7) | 18.8 (18.1-19.5)           | 2.8 (2.6-2.9) | 11.4 (10.8-12.0)           |
|                | <b>65</b>                    | 3224 | 20.2                  | 13.2 (13.0-13.4) | 65.4 (64.5-66.3)           | 4.2 (4.0-4.4) | 20.9 (20.1-21.8)           | 2.8 (2.6-2.9) | 13.7 (13.0-14.4)           |
|                | <b>70</b>                    | 2535 | 16.3                  | 9.7 (9.5-9.9)    | 59.5 (58.4-60.7)           | 3.8 (3.7-4.0) | 23.5 (22.4-24.6)           | 2.8 (2.6-2.9) | 17.0 (16.0-17.9)           |
|                | <b>75</b>                    | 2051 | 12.6                  | 6.6 (6.4-6.8)    | 52.2 (50.7-53.7)           | 3.3 (3.1-3.5) | 26.0 (24.6-27.4)           | 2.8 (2.6-2.9) | 21.8 (20.5-23.1)           |
|                | <b>80</b>                    | 1294 | 9.4                   | 3.9 (3.7-4.1)    | 41.8 (39.7-43.8)           | 2.8 (2.6-3.0) | 30.0 (28.1-32.0)           | 2.6 (2.5-2.8) | 28.2 (26.3-30.1)           |
|                | <b>85+</b>                   | 972  | 6.6                   | 2.3 (2.1-2.5)    | 34.6 (31.6-37.6)           | 2.1 (1.9-2.3) | 31.5 (28.6-34.4)           | 2.3 (2.1-2.4) | 33.9 (31.0-36.9)           |

<sup>a</sup> Austria, Germany, France, Switzerland and Belgium.

**Table A4: Life expectancy (LE) by frailty state in women and men by 5-year age group in the Southern SHARE population<sup>a</sup> in 2004-05 (Wave 1) and 2015 (Wave 6)**

|                | Age at start of the interval | N    | Total Life Expectancy | Non-Frail        |                            | Pre-Frail     |                            | Frail         |                            |
|----------------|------------------------------|------|-----------------------|------------------|----------------------------|---------------|----------------------------|---------------|----------------------------|
|                |                              |      |                       | LE (95% CI)      | % of total life expectancy | LE (95% CI)   | % of total life expectancy | LE (95% CI)   | % of total life expectancy |
| <b>2004-05</b> | <b>50</b>                    | 1189 | 32.3                  | 20.3 (19.9-20.7) | 62.9 (61.7-64.0)           | 7.3 (6.9-7.7) | 22.6 (21.5-23.7)           | 4.7 (4.4-5.0) | 14.5 (13.5-15.5)           |
|                | <b>55</b>                    | 1218 | 27.8                  | 16.5 (16.2-16.9) | 59.5 (58.2-60.8)           | 6.7 (6.3-7.0) | 23.9 (22.7-25.2)           | 4.6 (4.3-4.9) | 16.6 (15.4-17.7)           |
|                | <b>60</b>                    | 1148 | 23.5                  | 13.0 (12.6-13.3) | 55.3 (53.8-56.9)           | 6.0 (5.6-6.3) | 25.5 (24.0-27.0)           | 4.5 (4.2-4.8) | 19.1 (17.7-20.5)           |
|                | <b>65</b>                    | 1031 | 19.3                  | 9.6 (9.2-9.9)    | 49.5 (47.7-51.3)           | 5.4 (5.0-5.7) | 27.9 (26.1-29.7)           | 4.4 (4.0-4.7) | 22.6 (20.9-24.3)           |
|                | <b>70</b>                    | 903  | 15.4                  | 6.5 (6.1-6.8)    | 42.2 (40.0-44.4)           | 4.7 (4.3-5.0) | 30.5 (28.3-32.8)           | 4.2 (3.9-4.5) | 27.2 (25.0-29.5)           |
|                | <b>75</b>                    | 575  | 11.8                  | 4.2 (3.8-4.5)    | 35.3 (32.4-38.2)           | 3.8 (3.4-4.1) | 32.1 (29.1-35.1)           | 3.8 (3.5-4.2) | 32.6 (29.6-35.6)           |
|                | <b>80</b>                    | 343  | 8.7                   | 2.2 (1.9-2.6)    | 25.6 (21.6-29.5)           | 2.9 (2.5-3.2) | 33.0 (28.7-37.3)           | 3.6 (3.2-4.0) | 41.4 (36.9-45.9)           |
|                | <b>85+</b>                   | 174  | 6.3                   | 1.4 (1.0-1.8)    | 22.8 (16.6-29.0)           | 2.2 (1.7-2.6) | 34.4 (27.4-41.5)           | 2.7 (2.2-3.2) | 42.8 (35.4-50.1)           |
| <b>2015</b>    | <b>50</b>                    | 1299 | 33.3                  | 22.0 (21.7-22.2) | 66.1 (65.3-66.8)           | 7.0 (6.7-7.2) | 20.9 (20.2-21.6)           | 4.3 (4.1-4.5) | 13.0 (12.4-13.6)           |
|                | <b>55</b>                    | 2079 | 28.8                  | 18.2 (18.0-18.5) | 63.3 (62.5-64.2)           | 6.3 (6.0-6.5) | 21.8 (21.0-22.6)           | 4.3 (4.1-4.5) | 14.9 (14.2-15.6)           |
|                | <b>60</b>                    | 2462 | 24.4                  | 14.4 (14.1-14.6) | 58.8 (57.8-59.8)           | 5.9 (5.6-6.1) | 24.0 (23.0-24.9)           | 4.2 (4.0-4.4) | 17.3 (16.4-18.1)           |
|                | <b>65</b>                    | 2371 | 20.3                  | 10.9 (10.7-11.2) | 53.8 (52.7-54.9)           | 5.3 (5.1-5.5) | 26.0 (24.9-27.1)           | 4.1 (3.9-4.3) | 20.2 (19.2-21.2)           |
|                | <b>70</b>                    | 1902 | 16.4                  | 7.8 (7.6-8.1)    | 47.8 (46.4-49.2)           | 4.6 (4.4-4.8) | 28.0 (26.7-29.4)           | 4.0 (3.8-4.2) | 24.2 (22.9-25.4)           |
|                | <b>75</b>                    | 1570 | 12.7                  | 5.2 (5.0-5.4)    | 40.7 (38.9-42.4)           | 3.8 (3.6-4.0) | 29.7 (28.0-31.4)           | 3.8 (3.6-4.0) | 29.7 (27.9-31.4)           |
|                | <b>80</b>                    | 1052 | 9.4                   | 3.2 (2.9-3.4)    | 33.6 (31.2-35.9)           | 2.9 (2.7-3.1) | 30.7 (28.3-33.1)           | 3.4 (3.1-3.6) | 35.8 (33.3-38.3)           |
|                | <b>85+</b>                   | 588  | 6.7                   | 1.7 (1.5-2.0)    | 25.9 (22.3-29.4)           | 2.2 (1.9-2.5) | 33.0 (29.2-36.8)           | 2.7 (2.5-3.0) | 41.2 (37.2-45.1)           |

<sup>a</sup>Italy, Spain and Greece.

**Table A5: Life expectancy (LE) by frailty state in women and men by 5-year age group in the Total SHARE population<sup>a</sup> (2004-05 (Wave 1))**

|              | Age at start of the interval | N    | Total Life Expectancy | Non-Frail        |                            | Pre-Frail     |                            | Frail         |                            |
|--------------|------------------------------|------|-----------------------|------------------|----------------------------|---------------|----------------------------|---------------|----------------------------|
|              |                              |      |                       | LE (95% CI)      | % of total life expectancy | LE (95% CI)   | % of total life expectancy | LE (95% CI)   | % of total life expectancy |
| <b>Women</b> | <b>50</b>                    | 2180 | 34.2                  | 21.7 (21.4-22.0) | 63.3 (62.4-64.2)           | 7.8 (7.5-8.1) | 22.9 (22.0-23.7)           | 4.7 (4.5-5.0) | 13.9 (13.1-14.6)           |
|              | <b>55</b>                    | 2195 | 29.7                  | 17.8 (17.5-18.1) | 59.9 (58.9-61.0)           | 7.2 (6.9-7.5) | 24.2 (23.2-25.2)           | 4.7 (4.4-5.0) | 15.9 (15.0-16.8)           |
|              | <b>60</b>                    | 1942 | 25.2                  | 14.1 (13.8-14.4) | 55.9 (54.7-57.1)           | 6.5 (6.2-6.8) | 25.7 (24.6-26.9)           | 4.6 (4.4-4.9) | 18.4 (17.3-19.4)           |
|              | <b>65</b>                    | 1744 | 20.8                  | 10.6 (10.3-10.9) | 50.9 (49.6-52.3)           | 5.7 (5.5-6.0) | 27.5 (26.2-28.9)           | 4.5 (4.2-4.7) | 21.5 (20.2-22.8)           |
|              | <b>70</b>                    | 1419 | 16.6                  | 7.3 (7.0-7.6)    | 43.9 (42.2-45.6)           | 5.1 (4.8-5.3) | 30.4 (28.7-32.1)           | 4.3 (4.0-4.6) | 25.7 (24.1-27.4)           |
|              | <b>75</b>                    | 1097 | 12.7                  | 4.8 (4.5-5.1)    | 37.6 (35.5-39.8)           | 4.1 (3.9-4.4) | 32.5 (30.4-34.7)           | 3.8 (3.5-4.1) | 29.8 (27.7-32.0)           |
|              | <b>80</b>                    | 693  | 9.3                   | 2.7 (2.5-3.0)    | 29.6 (26.7-32.5)           | 3.2 (2.9-3.4) | 34.0 (30.9-37.1)           | 3.4 (3.1-3.7) | 36.4 (33.3-39.5)           |
|              | <b>85+</b>                   | 354  | 6.6                   | 1.7 (1.4-2.0)    | 25.7 (21.1-30.2)           | 2.3 (2.0-2.6) | 35.3 (30.3-40.3)           | 2.6 (2.2-2.9) | 39.0 (33.9-44.1)           |
| <b>Men</b>   | <b>50</b>                    | 1877 | 29.2                  | 23.9 (23.7-24.2) | 81.8 (81.0-82.6)           | 3.4 (3.2-3.6) | 11.6 (10.9-12.3)           | 1.9 (1.8-2.1) | 6.6 (6.0-7.1)              |
|              | <b>55</b>                    | 1907 | 25.0                  | 19.8 (19.6-20.1) | 79.4 (78.5-80.3)           | 3.3 (3.1-3.5) | 13.0 (12.2-13.8)           | 1.9 (1.7-2.1) | 7.6 (6.9-8.2)              |
|              | <b>60</b>                    | 1774 | 20.9                  | 16.0 (15.8-16.3) | 76.8 (75.7-78.0)           | 3.0 (2.8-3.2) | 14.4 (13.4-15.3)           | 1.8 (1.7-2.0) | 8.8 (8.0-9.6)              |
|              | <b>65</b>                    | 1601 | 17.0                  | 12.3 (12.1-12.6) | 72.5 (71.1-73.9)           | 2.9 (2.7-3.1) | 17.0 (15.8-18.2)           | 1.8 (1.6-2.0) | 10.5 (9.5-11.6)            |
|              | <b>70</b>                    | 1307 | 13.5                  | 9.0 (8.7-9.2)    | 66.8 (64.9-68.6)           | 2.7 (2.5-2.9) | 20.1 (18.5-21.7)           | 1.8 (1.6-2.0) | 13.2 (11.8-14.6)           |
|              | <b>75</b>                    | 903  | 10.3                  | 6.2 (6.0-6.5)    | 60.5 (58.0-63.1)           | 2.3 (2.0-2.5) | 21.9 (19.7-24.1)           | 1.8 (1.6-2.0) | 17.5 (15.5-19.6)           |
|              | <b>80</b>                    | 490  | 7.6                   | 4.0 (3.7-4.3)    | 52.7 (48.8-56.6)           | 1.9 (1.6-2.2) | 25.0 (21.6-28.4)           | 1.7 (1.4-1.9) | 22.3 (19.0-25.5)           |
|              | <b>85+</b>                   | 215  | 5.6                   | 2.7 (2.4-3.1)    | 48.9 (42.3-55.6)           | 1.6 (1.2-1.9) | 28.3 (22.3-34.3)           | 1.3 (1.0-1.6) | 22.7 (17.1-28.3)           |

<sup>a</sup> Denmark, Sweden, Austria, Germany, France, Switzerland, Belgium, Italy, Spain and Greece.

**Table A6: Life expectancy (LE) by frailty state in women and men by 5-year age group in the Total SHARE population<sup>a</sup> (2015 (Wave 6))**

| Gender       | Age at start of the interval | N    | Total Life Expectancy | Non-Frail        |                            | Pre-Frail     |                            | Frail         |                            |
|--------------|------------------------------|------|-----------------------|------------------|----------------------------|---------------|----------------------------|---------------|----------------------------|
|              |                              |      |                       | LE (95% CI)      | % of total life expectancy | LE (95% CI)   | % of total life expectancy | LE (95% CI)   | % of total life expectancy |
| <b>Women</b> | <b>50</b>                    | 2339 | 35.4                  | 22.6 (22.4-22.8) | 63.8 (63.1-64.4)           | 7.9 (7.7-8.1) | 22.3 (21.7-23.0)           | 4.9 (4.7-5.1) | 13.9 (13.4-14.4)           |
|              | <b>55</b>                    | 3458 | 30.8                  | 18.7 (18.5-18.9) | 60.8 (60.1-61.5)           | 7.2 (7.0-7.4) | 23.5 (22.9-24.2)           | 4.8 (4.6-5.0) | 15.7 (15.1-16.2)           |
|              | <b>60</b>                    | 3785 | 26.3                  | 15.0 (14.8-15.2) | 56.9 (56.1-57.7)           | 6.7 (6.5-6.9) | 25.4 (24.6-26.1)           | 4.7 (4.5-4.8) | 17.7 (17.1-18.4)           |
|              | <b>65</b>                    | 3669 | 21.9                  | 11.4 (11.2-11.6) | 51.9 (51.0-52.8)           | 6.0 (5.8-6.2) | 27.3 (26.4-28.2)           | 4.6 (4.4-4.7) | 20.8 (19.9-21.6)           |
|              | <b>70</b>                    | 2890 | 17.7                  | 8.1 (7.9-8.3)    | 45.8 (44.7-46.9)           | 5.2 (5.0-5.4) | 29.2 (28.1-30.3)           | 4.4 (4.2-4.6) | 25.0 (24.0-26.1)           |
|              | <b>75</b>                    | 2279 | 13.7                  | 5.3 (5.1-5.4)    | 38.3 (37.0-39.7)           | 4.2 (4.0-4.4) | 30.9 (29.5-32.3)           | 4.2 (4.0-4.4) | 30.8 (29.4-32.2)           |
|              | <b>80</b>                    | 1530 | 10.1                  | 3.0 (2.9-3.2)    | 30.3 (28.5-32.1)           | 3.3 (3.1-3.4) | 32.3 (30.5-34.2)           | 3.8 (3.6-4.0) | 37.4 (35.5-39.3)           |
|              | <b>85+</b>                   | 1094 | 7.1                   | 1.7 (1.5-1.9)    | 23.9 (21.4-26.4)           | 2.3 (2.1-2.5) | 33.1 (30.3-35.9)           | 3.0 (2.8-3.2) | 43.0 (40.0-45.9)           |
| <b>Men</b>   | <b>50</b>                    | 1557 | 31.0                  | 25.4 (25.2-25.6) | 82.0 (81.5-82.6)           | 3.8 (3.6-3.9) | 12.2 (11.7-12.7)           | 1.8 (1.7-1.9) | 5.7 (5.4-6.1)              |
|              | <b>55</b>                    | 2632 | 26.6                  | 21.3 (21.1-21.5) | 80.2 (79.6-80.8)           | 3.5 (3.3-3.6) | 13.1 (12.6-13.6)           | 1.8 (1.7-1.9) | 6.7 (6.3-7.1)              |
|              | <b>60</b>                    | 3261 | 22.4                  | 17.4 (17.2-17.6) | 77.7 (76.9-78.4)           | 3.2 (3.1-3.4) | 14.5 (13.8-15.1)           | 1.8 (1.7-1.9) | 7.9 (7.4-8.4)              |
|              | <b>65</b>                    | 3360 | 18.5                  | 13.7 (13.5-13.9) | 74.0 (73.1-74.9)           | 3.0 (2.9-3.2) | 16.5 (15.7-17.2)           | 1.8 (1.6-1.9) | 9.5 (8.9-10.2)             |
|              | <b>70</b>                    | 2695 | 14.8                  | 10.3 (10.1-10.5) | 69.5 (68.4-70.6)           | 2.8 (2.7-3.0) | 19.0 (18.1-20.0)           | 1.7 (1.6-1.8) | 11.5 (10.7-12.3)           |
|              | <b>75</b>                    | 2151 | 11.4                  | 7.2 (7.1-7.4)    | 63.5 (62.1-65.0)           | 2.5 (2.3-2.6) | 21.7 (20.4-23.0)           | 1.7 (1.6-1.8) | 14.8 (13.7-15.9)           |
|              | <b>80</b>                    | 1316 | 8.4                   | 4.6 (4.4-4.8)    | 55.0 (52.9-57.2)           | 2.2 (2.0-2.3) | 25.9 (24.0-27.8)           | 1.6 (1.5-1.7) | 19.1 (17.4-20.8)           |
|              | <b>85+</b>                   | 843  | 6.0                   | 2.9 (2.7-3.1)    | 47.8 (44.4-51.1)           | 1.7 (1.6-1.9) | 29.2 (26.1-32.2)           | 1.4 (1.2-1.6) | 23.1 (20.2-25.9)           |

<sup>a</sup> Denmark, Sweden, Austria, Germany, France, Switzerland, Belgium, Italy, Spain and Greece.

**Table A7: Life expectancy (LE) by frailty state in women and men by 5-year age group in the Northern SHARE population<sup>a</sup> (2004-05 (Wave 1))**

| Gender       | Age at start of the interval | N   | Total Life Expectancy | Non-Frail        |                            | Pre-Frail     |                            | Frail         |                            |
|--------------|------------------------------|-----|-----------------------|------------------|----------------------------|---------------|----------------------------|---------------|----------------------------|
|              |                              |     |                       | LE (95% CI)      | % of total life expectancy | LE (95% CI)   | % of total life expectancy | LE (95% CI)   | % of total life expectancy |
| <b>Women</b> | 50                           | 411 | 33.1                  | 24.4 (23.8-25.0) | 73.6 (71.8-75.5)           | 6.2 (5.7-6.8) | 18.8 (17.1-20.6)           | 2.5 (2.1-2.9) | 7.5 (6.2-8.8)              |
|              | 55                           | 479 | 28.6                  | 20.3 (19.7-20.9) | 70.9 (68.8-73.0)           | 5.9 (5.3-6.4) | 20.5 (18.5-22.5)           | 2.5 (2.0-2.9) | 8.6 (7.1-10.1)             |
|              | 60                           | 382 | 24.2                  | 16.5 (15.9-17.1) | 68.1 (65.7-70.6)           | 5.4 (4.8-5.9) | 22.1 (19.7-24.5)           | 2.4 (1.9-2.8) | 9.7 (7.9-11.5)             |
|              | 65                           | 307 | 20.0                  | 12.8 (12.2-13.4) | 63.8 (60.9-66.8)           | 4.9 (4.3-5.5) | 24.6 (21.7-27.4)           | 2.3 (1.9-2.8) | 11.6 (9.4-13.8)            |
|              | 70                           | 250 | 16.1                  | 9.2 (8.7-9.8)    | 57.5 (53.8-61.2)           | 4.6 (4.0-5.2) | 28.5 (24.9-32.1)           | 2.2 (1.8-2.7) | 14.0 (11.1-16.8)           |
|              | 75                           | 213 | 12.5                  | 6.2 (5.6-6.8)    | 49.5 (44.8-54.3)           | 4.0 (3.5-4.6) | 32.4 (27.8-37.1)           | 2.2 (1.8-2.7) | 18.0 (14.1-21.9)           |
|              | 80                           | 116 | 9.2                   | 3.6 (3.0-4.2)    | 39.0 (32.4-45.6)           | 3.4 (2.8-4.0) | 37.2 (30.6-43.8)           | 2.2 (1.7-2.7) | 23.8 (17.9-29.7)           |
|              | 85                           | 93  | 6.6                   | 2.2 (1.6-2.8)    | 33.8 (24.2-43.5)           | 2.7 (2.1-3.4) | 41.6 (31.5-51.6)           | 1.6 (1.0-2.2) | 24.6 (15.8-33.4)           |
| <b>Men</b>   | 50                           | 364 | 29.3                  | 26.2 (25.7-26.6) | 89.2 (87.8-90.6)           | 2.1 (1.7-2.4) | 7.0 (5.8-8.2)              | 1.1 (0.8-1.4) | 3.8 (2.9-4.7)              |
|              | 55                           | 391 | 24.9                  | 21.8 (21.4-22.2) | 87.3 (85.6-89.0)           | 2.1 (1.7-2.4) | 8.3 (6.9-9.7)              | 1.1 (0.8-1.4) | 4.4 (3.3-5.5)              |
|              | 60                           | 368 | 20.7                  | 17.7 (17.3-18.1) | 85.4 (83.3-87.4)           | 2.0 (1.6-2.3) | 9.4 (7.7-11.2)             | 1.1 (0.8-1.4) | 5.2 (3.9-6.5)              |
|              | 65                           | 302 | 16.8                  | 13.9 (13.5-14.3) | 82.5 (79.9-85.0)           | 1.9 (1.5-2.3) | 11.2 (9.1-13.4)            | 1.1 (0.8-1.3) | 6.3 (4.6-8.0)              |
|              | 70                           | 244 | 13.3                  | 10.4 (9.9-10.8)  | 78.2 (74.8-81.7)           | 1.8 (1.4-2.2) | 13.7 (10.8-16.6)           | 1.1 (0.8-1.4) | 8.1 (5.7-10.4)             |
|              | 75                           | 198 | 10.1                  | 7.4 (7.0-7.9)    | 73.7 (69.0-78.4)           | 1.7 (1.3-2.1) | 16.5 (12.5-20.6)           | 1.0 (0.7-1.3) | 9.8 (6.5-13.0)             |
|              | 80                           | 105 | 7.4                   | 5.2 (4.6-5.7)    | 70.2 (63.1-77.3)           | 1.3 (0.9-1.8) | 18.1 (12.1-24.1)           | 0.9 (0.5-1.2) | 11.7 (6.7-16.8)            |
|              | 85                           | 59  | 5.3                   | 3.5 (2.8-4.1)    | 65.7 (53.6-77.8)           | 1.1 (0.6-1.7) | 21.7 (11.2-32.2)           | 0.7 (0.2-1.1) | 12.7 (4.2-21.1)            |

<sup>a</sup> Denmark and Sweden.

**Table A8: Life expectancy (LE) by frailty state in women and men by 5-year age group in the Northern SHARE population<sup>a</sup> (2015 (Wave 6))**

| Gender       | Age at start of the interval | N   | Total Life Expectancy | Non-Frail        |                            | Pre-Frail     |                             | Frail         |                            |
|--------------|------------------------------|-----|-----------------------|------------------|----------------------------|---------------|-----------------------------|---------------|----------------------------|
|              |                              |     |                       | LE (95% CI)      | % of total life expectancy | LE (95% CI)   | % of total life expectancy  | LE (95% CI)   | % of total life expectancy |
| <b>Women</b> | 50                           | 392 | 34.6                  | 26.5 (26.0-27.0) | 76.6 (75.3-78.0)           | 5.5 (5.0-5.9) | 15.8 (14.5-17.0)            | 2.6 (2.3-2.9) | 7.6 (6.6-8.5)              |
|              | 55                           | 543 | 29.9                  | 22.2 (21.7-22.6) | 74.2 (72.7-75.7)           | 5.1 (4.7-5.5) | 17.1 (15.8-18.5)            | 2.6 (2.3-2.9) | 8.7 (7.6-9.8)              |
|              | 60                           | 651 | 25.4                  | 18.1 (17.6-18.5) | 71.1 (69.4-72.9)           | 4.8 (4.4-5.2) | 18.9 (17.3-20.5)            | 2.5 (2.2-2.9) | 10.0 (8.7-11.3)            |
|              | 65                           | 747 | 21.1                  | 14.2 (13.8-14.7) | 67.4 (65.4-69.5)           | 4.3 (3.9-4.7) | 20.6 (18.7-22.4)            | 2.5 (2.2-2.9) | 12.0 (10.4-13.6)           |
|              | 70                           | 602 | 17.0                  | 10.6 (10.1-11.0) | 62.2 (59.7-64.7)           | 4.0 (3.6-4.4) | 23.3 (21.0-25.7)            | 2.5 (2.1-2.8) | 14.5 (12.5-16.5)           |
|              | 75                           | 398 | 13.2                  | 7.3 (6.8-7.7)    | 55.2 (51.9-58.5)           | 3.5 (3.1-3.9) | 26.8 (23.8-29.9)            | 2.4 (2.0-2.7) | 18.0 (15.3-20.7)           |
|              | 80                           | 270 | 9.7                   | 4.6 (4.1-5.0)    | 46.9 (42.4-51.4)           | 2.8 (2.4-3.2) | 29.2 (25.0-33.4)            | 2.3 (1.9-2.7) | 23.9 (19.9-27.9)           |
|              | 85                           | 206 | 6.9                   | 2.6 (2.2-3.1)    | 38.2 (31.6-44.9)           | 2.2 (1.8-2.7) | 32.3 (25.9-38.7)            | 2.0 (1.6-2.4) | 29.5 (23.3-35.7)           |
| <b>Men</b>   | 50                           | 285 | 31.3                  | 27.9 (27.6-28.3) | 89.1 (88.1-90.2)           | 2.1 (1.8-2.4) | 6.7 (5.8-7.6)               | 1.3 (1.1-1.5) | 4.2 (3.5-4.9)              |
|              | 55                           | 433 | 26.9                  | 23.6 (23.2-23.9) | 87.7 (86.5-88.9)           | 2.0 (1.7-2.3) | 7.4 (6.5-8.4)               | 1.3 (1.1-1.5) | 4.9 (4.0-5.7)              |
|              | 60                           | 573 | 22.5                  | 19.3 (19.0-19.6) | 85.7 (84.3-87.1)           | 1.9 (1.7-2.2) | 8.6 (7.4-9.7)               | 1.3 (1.1-1.5) | 5.7 (4.7-6.7)              |
|              | 65                           | 687 | 18.5                  | 15.4 (15.1-15.7) | 83.2 (81.5-84.9)           | 1.8 (1.5-2.1) | 9.7 (8.3-11.1) <sup>1</sup> | 1.3 (1.1-1.5) | 7.1 (5.8-8.3)              |
|              | 70                           | 546 | 14.6                  | 11.7 (11.4-12.0) | 79.9 (77.7-82.2)           | 1.6 (1.4-1.9) | 11.1 (9.3-12.8)             | 1.3 (1.1-1.6) | 9.0 (7.4-10.6)             |
|              | 75                           | 411 | 11.2                  | 8.4 (8.1-8.7)    | 75.0 (71.9-78.0)           | 1.5 (1.2-1.7) | 12.9 (10.5-15.4)            | 1.4 (1.1-1.6) | 12.1 (9.7-14.4)            |
|              | 80                           | 230 | 8.1                   | 5.7 (5.3-6.0)    | 69.7 (65.2-74.2)           | 1.3 (1.0-1.5) | 15.4 (11.9-19.0)            | 1.2 (0.9-1.5) | 14.9 (11.4-18.4)           |
|              | 85                           | 171 | 5.7                   | 3.5 (3.1-3.9)    | 61.6 (54.3-68.9)           | 1.0 (0.7-1.3) | 17.4 (11.7-23.1)            | 1.2 (0.8-1.5) | 21.0 (14.9-27.1)           |

<sup>a</sup> Denmark and Sweden.

**Table A9: Life expectancy (LE) by frailty state in women and men by 5-year age group in the Central SHARE population<sup>a</sup> (2004-05 (Wave 1))**

| Gender       | Age at start of the interval | N    | Total Life Expectancy | Non-Frail        |                            | Pre-Frail     |                            | Frail         |                            |
|--------------|------------------------------|------|-----------------------|------------------|----------------------------|---------------|----------------------------|---------------|----------------------------|
|              |                              |      |                       | LE (95% CI)      | % of total life expectancy | LE (95% CI)   | % of total life expectancy | LE (95% CI)   | % of total life expectancy |
| <b>Women</b> | 50                           | 1092 | 34.0                  | 23.8 (23.4-24.2) | 69.9 (68.7-71.2)           | 6.5 (6.1-6.9) | 19.2 (18.1-20.4)           | 3.7 (3.3-4.0) | 10.8 (9.8-11.8)            |
|              | 55                           | 1069 | 29.5                  | 19.7 (19.3-20.1) | 66.8 (65.4-68.2)           | 6.1 (5.7-6.5) | 20.6 (19.3-22.0)           | 3.7 (3.4-4.1) | 12.6 (11.4-13.8)           |
|              | 60                           | 945  | 25.0                  | 15.8 (15.3-16.2) | 62.9 (61.3-64.6)           | 5.6 (5.2-6.0) | 22.2 (20.7-23.8)           | 3.7 (3.4-4.1) | 14.8 (13.4-16.2)           |
|              | 65                           | 887  | 20.7                  | 12.1 (11.7-12.5) | 58.4 (56.4-60.3)           | 5.0 (4.6-5.4) | 24.1 (22.2-26.0)           | 3.6 (3.3-4.0) | 17.6 (15.8-19.3)           |
|              | 70                           | 708  | 16.5                  | 8.5 (8.1-8.9)    | 51.5 (49.0-54.0)           | 4.5 (4.1-4.9) | 27.2 (24.9-29.6)           | 3.5 (3.2-3.9) | 21.3 (19.0-23.5)           |
|              | 75                           | 562  | 12.7                  | 5.6 (5.2-6.0)    | 44.3 (41.1-47.5)           | 3.8 (3.4-4.2) | 30.2 (27.1-33.3)           | 3.2 (2.9-3.6) | 25.5 (22.5-28.5)           |
|              | 80                           | 373  | 9.2                   | 3.3 (2.9-3.7)    | 35.7 (31.3-40.2)           | 3.0 (2.6-3.4) | 32.8 (28.4-37.3)           | 2.9 (2.5-3.3) | 31.4 (27.0-35.9)           |
|              | 85                           | 157  | 6.5                   | 2.0 (1.5-2.5)    | 31.0 (23.7-38.2)           | 2.2 (1.7-2.6) | 33.4 (26.0-40.8)           | 2.3 (1.8-2.8) | 35.6 (28.1-43.1)           |
| <b>Men</b>   | 50                           | 1001 | 29.0                  | 24.6 (24.3-24.9) | 85.0 (83.9-86.1)           | 2.8 (2.5-3.1) | 9.6 (8.7-10.6)             | 1.6 (1.4-1.8) | 5.4 (4.7-6.2)              |
|              | 55                           | 945  | 24.8                  | 20.5 (20.2-20.9) | 82.9 (81.6-84.2)           | 2.7 (2.4-3.0) | 10.9 (9.8-12.0)            | 1.5 (1.3-1.8) | 6.2 (5.3-7.1)              |
|              | 60                           | 873  | 20.8                  | 16.7 (16.4-17.1) | 80.6 (79.1-82.2)           | 2.5 (2.3-2.8) | 12.2 (10.9-13.6)           | 1.5 (1.3-1.7) | 7.1 (6.0-8.2)              |
|              | 65                           | 818  | 16.9                  | 13.0 (12.7-13.4) | 76.9 (74.9-78.9)           | 2.5 (2.2-2.8) | 14.6 (12.9-16.4)           | 1.4 (1.2-1.7) | 8.4 (7.1-9.8)              |
|              | 70                           | 621  | 13.4                  | 9.7 (9.3-10.0)   | 71.9 (69.2-74.5)           | 2.4 (2.1-2.7) | 17.6 (15.3-19.9)           | 1.4 (1.2-1.7) | 10.5 (8.6-12.3)            |
|              | 75                           | 452  | 10.3                  | 6.8 (6.4-7.2)    | 65.9 (62.1-69.6)           | 2.0 (1.7-2.4) | 19.9 (16.6-23.1)           | 1.5 (1.2-1.7) | 14.2 (11.5-17.0)           |
|              | 80                           | 246  | 7.6                   | 4.7 (4.3-5.1)    | 61.6 (55.8-67.3)           | 1.7 (1.3-2.1) | 22.7 (17.6-27.7)           | 1.2 (0.9-1.5) | 15.8 (11.6-20.0)           |
|              | 85                           | 86   | 5.6                   | 3.3 (2.7-3.9)    | 58.6 (48.2-69.0)           | 1.6 (1.0-2.1) | 27.6 (18.2-37.1)           | 0.8 (0.4-1.2) | 13.8 (6.5-21.1)            |

<sup>a</sup> Austria, Germany, France, Switzerland and Belgium.

**Table A10: Life expectancy (LE) by frailty state in women and men by 5-year age group in the Central SHARE population<sup>a</sup> (2015 (Wave 6))**

| Gender       | Age at start of the interval | N    | Total Life Expectancy | Non-Frail        |                            | Pre-Frail     |                            | Frail         |                            |
|--------------|------------------------------|------|-----------------------|------------------|----------------------------|---------------|----------------------------|---------------|----------------------------|
|              |                              |      |                       | LE (95% CI)      | % of total life expectancy | LE (95% CI)   | % of total life expectancy | LE (95% CI)   | % of total life expectancy |
| <b>Women</b> | 50                           | 1150 | 35.1                  | 24.0 (23.7-24.4) | 68.5 (67.6-69.3)           | 7.0 (6.7-7.3) | 19.9 (19.1-20.7)           | 4.1 (3.8-4.3) | 11.6 (11.0-12.3)           |
|              | 55                           | 1690 | 30.5                  | 20.0 (19.7-20.3) | 65.7 (64.7-66.6)           | 6.5 (6.2-6.8) | 21.3 (20.3-22.2)           | 4.0 (3.8-4.2) | 13.1 (12.3-13.8)           |
|              | 60                           | 1823 | 26.1                  | 16.2 (16.0-16.5) | 62.3 (61.2-63.4)           | 6.0 (5.7-6.3) | 22.9 (21.9-24.0)           | 3.8 (3.6-4.1) | 14.7 (13.8-15.6)           |
|              | 65                           | 1692 | 21.7                  | 12.5 (12.3-12.8) | 57.7 (56.4-59.0)           | 5.4 (5.1-5.7) | 24.8 (23.6-26.1)           | 3.8 (3.6-4.0) | 17.5 (16.4-18.6)           |
|              | 70                           | 1320 | 17.6                  | 9.1 (8.8-9.3)    | 51.5 (49.9-53.1)           | 4.7 (4.5-5.0) | 26.9 (25.4-28.4)           | 3.8 (3.6-4.1) | 21.6 (20.2-23.0)           |
|              | 75                           | 1097 | 13.6                  | 6.0 (5.7-6.2)    | 43.8 (41.8-45.7)           | 3.9 (3.7-4.2) | 28.9 (27.0-30.8)           | 3.7 (3.5-4.0) | 27.3 (25.4-29.2)           |
|              | 80                           | 706  | 10.0                  | 3.4 (3.2-3.7)    | 34.4 (31.9-37.0)           | 3.1 (2.9-3.4) | 31.4 (28.8-34.0)           | 3.4 (3.2-3.7) | 34.2 (31.5-36.8)           |
|              | 85                           | 581  | 7.0                   | 1.9 (1.7-2.2)    | 27.5 (23.9-31.1)           | 2.2 (2.0-2.5) | 31.9 (28.1-35.6)           | 2.8 (2.6-3.1) | 40.7 (36.7-44.7)           |
| <b>Men</b>   | 50                           | 770  | 30.6                  | 25.5 (25.3-25.8) | 83.5 (82.7-84.2)           | 3.5 (3.3-3.8) | 11.6 (10.9-12.3)           | 1.5 (1.4-1.7) | 5.0 (4.5-5.4)              |
|              | 55                           | 1345 | 26.2                  | 21.4 (21.1-21.6) | 81.5 (80.6-82.4)           | 3.3 (3.1-3.5) | 12.6 (11.9-13.4)           | 1.5 (1.4-1.7) | 5.9 (5.3-6.4)              |
|              | 60                           | 1537 | 22.1                  | 17.6 (17.4-17.8) | 79.5 (78.5-80.5)           | 3.0 (2.8-3.2) | 13.7 (12.7-14.6)           | 1.5 (1.4-1.7) | 6.9 (6.2-7.6)              |
|              | 65                           | 1532 | 18.3                  | 13.9 (13.7-14.1) | 75.8 (74.5-77.0)           | 2.9 (2.7-3.1) | 15.9 (14.7-17.0)           | 1.5 (1.4-1.7) | 8.4 (7.5-9.2)              |
|              | 70                           | 1215 | 14.7                  | 10.5 (10.3-10.7) | 71.2 (69.6-72.8)           | 2.8 (2.6-3.0) | 18.8 (17.4-20.2)           | 1.5 (1.3-1.6) | 10.0 (8.9-11.1)            |
|              | 75                           | 954  | 11.3                  | 7.4 (7.2-7.7)    | 65.4 (63.3-67.6)           | 2.4 (2.2-2.7) | 21.6 (19.7-23.5)           | 1.5 (1.3-1.7) | 13.0 (11.4-14.6)           |
|              | 80                           | 588  | 8.4                   | 4.6 (4.3-4.9)    | 55.2 (52.0-58.3)           | 2.3 (2.1-2.5) | 27.5 (24.7-30.4)           | 1.4 (1.2-1.7) | 17.3 (14.9-19.8)           |
|              | 85                           | 391  | 6.0                   | 2.9 (2.6-3.2)    | 48.5 (43.6-53.5)           | 1.8 (1.6-2.1) | 30.7 (26.2-35.3)           | 1.2 (1.0-1.5) | 20.7 (16.7-24.7)           |

<sup>a</sup> Austria, Germany, France, Switzerland and Belgium.

**Table A11: Life expectancy (LE) by frailty state in women and men by 5-year age group in the Southern SHARE population<sup>a</sup> (2004-05 (Wave 1))**

| Gender       | Age at start of the interval | N   | Life Expectancy | Non-Frail        |                            | Pre-Frail       |                            | Frail         |                            |
|--------------|------------------------------|-----|-----------------|------------------|----------------------------|-----------------|----------------------------|---------------|----------------------------|
|              |                              |     |                 | LE (95% CI)      | % of total life expectancy | LE (95% CI)     | % of total life expectancy | LE (95% CI)   | % of total life expectancy |
| <b>Women</b> | 50                           | 677 | 34.7            | 18.0 (17.4-18.5) | 51.7 (50.1-53.3)           | 10.0 (9.4-10.6) | 28.8 (27.1-30.5)           | 6.8 (6.2-7.3) | 19.5 (17.9-21.0)           |
|              | 55                           | 647 | 30.1            | 14.5 (14.0-15.0) | 48.2 (46.4-50.0)           | 9.0 (8.4-9.5)   | 29.8 (27.9-31.7)           | 6.6 (6.1-7.1) | 22.0 (20.2-23.8)           |
|              | 60                           | 615 | 25.5            | 11.1 (10.6-11.6) | 43.6 (41.6-45.6)           | 8.0 (7.4-8.6)   | 31.3 (29.1-33.5)           | 6.4 (5.9-6.9) | 25.1 (23.0-27.1)           |
|              | 65                           | 550 | 21.1            | 8.0 (7.5-8.5)    | 38.0 (35.7-40.4)           | 6.9 (6.4-7.5)   | 32.9 (30.3-35.5)           | 6.1 (5.6-6.7) | 29.0 (26.5-31.6)           |
|              | 70                           | 461 | 16.8            | 5.2 (4.7-5.7)    | 30.8 (28.1-33.6)           | 5.9 (5.4-6.4)   | 35.0 (31.8-38.2)           | 5.8 (5.2-6.3) | 34.2 (31.0-37.4)           |
|              | 75                           | 322 | 12.9            | 3.3 (2.8-3.7)    | 25.3 (21.9-28.7)           | 4.6 (4.1-5.2)   | 36.0 (31.9-40.2)           | 5.0 (4.4-5.5) | 38.7 (34.5-42.9)           |
|              | 80                           | 204 | 9.4             | 1.7 (1.3-2.1)    | 17.9 (13.5-22.4)           | 3.3 (2.8-3.9)   | 35.2 (29.4-41.0)           | 4.4 (3.8-5.0) | 46.9 (40.9-52.9)           |
|              | 85                           | 104 | 6.7             | 1.0 (0.5-1.4)    | 14.3 (7.5-21.0)            | 2.5 (1.9-3.1)   | 37.2 (27.9-46.5)           | 3.2 (2.6-3.9) | 48.5 (38.9-58.1)           |
| <b>Men</b>   | 50                           | 512 | 29.7            | 22.7 (22.2-23.1) | 76.4 (74.9-77.9)           | 4.5 (4.1-4.9)   | 15.1 (13.8-16.5)           | 2.5 (2.2-2.8) | 8.5 (7.3-9.6)              |
|              | 55                           | 571 | 25.3            | 18.6 (18.1-19.0) | 73.5 (71.8-75.3)           | 4.2 (3.8-4.6)   | 16.7 (15.1-18.3)           | 2.5 (2.1-2.8) | 9.8 (8.4-11.1)             |
|              | 60                           | 533 | 21.1            | 14.9 (14.5-15.3) | 70.5 (68.5-72.6)           | 3.8 (3.4-4.2)   | 18.1 (16.2-20.0)           | 2.4 (2.1-2.7) | 11.4 (9.7-13.0)            |
|              | 65                           | 481 | 17.2            | 11.2 (10.8-11.6) | 65.2 (62.6-67.8)           | 3.6 (3.2-4.0)   | 21.1 (18.7-23.4)           | 2.4 (2.0-2.7) | 13.7 (11.7-15.8)           |
|              | 70                           | 442 | 13.5            | 8.0 (7.5-8.4)    | 58.8 (55.5-62.1)           | 3.3 (2.8-3.7)   | 24.1 (21.0-27.2)           | 2.3 (1.9-2.7) | 17.1 (14.3-19.9)           |
|              | 75                           | 253 | 10.3            | 5.3 (4.8-5.8)    | 51.5 (46.9-56.1)           | 2.7 (2.2-3.1)   | 25.8 (21.6-30.0)           | 2.3 (1.9-2.8) | 22.7 (18.6-26.7)           |
|              | 80                           | 139 | 7.6             | 2.9 (2.4-3.4)    | 38.6 (31.8-45.4)           | 2.2 (1.7-2.7)   | 29.4 (23.0-35.8)           | 2.4 (1.9-2.9) | 32.0 (25.4-38.5)           |
|              | 85                           | 70  | 5.6             | 2.0 (1.4-2.6)    | 35.6 (24.4-46.8)           | 1.7 (1.1-2.3)   | 30.2 (19.4-40.9)           | 1.9 (1.3-2.5) | 34.2 (23.1-45.3)           |

<sup>a</sup> Italy, Spain and Greece.

**Table A12: Life expectancy (LE) by frailty state in women and men by 5-year age group in the Southern SHARE population<sup>a</sup> (2015 (Wave 6))**

| Gender       | Age at start of the interval | N    | Total Life Expectancy | Non-Frail        |                            | Pre-Frail                  |                            | Frail         |                            |
|--------------|------------------------------|------|-----------------------|------------------|----------------------------|----------------------------|----------------------------|---------------|----------------------------|
|              |                              |      |                       | LE (95% CI)      | % of total life expectancy | LE (95% CI)                | % of total life expectancy | LE (95% CI)   | % of total life expectancy |
| <b>Women</b> | 50                           | 797  | 36.0                  | 19.5 (19.2-19.9) | 54.3 (53.3-55.4)           | 9.8 (9.4-10.) <sup>2</sup> | 27.2 (26.0-28.3)           | 6.6 (6.3-7.0) | 18.5 (17.5-19.5)           |
|              | 55                           | 1225 | 31.3                  | 15.9 (15.6-16.3) | 50.9 (49.8-52.1)           | 8.8 (8.4-9.2)              | 28.1 (26.9-29.4)           | 6.6 (6.2-6.9) | 20.9 (19.8-22.1)           |
|              | 60                           | 1311 | 26.7                  | 12.3 (11.9-12.6) | 46.0 (44.7-47.3)           | 8.1 (7.7-8.5)              | 30.2 (28.8-31.6)           | 6.4 (6.0-6.7) | 23.8 (22.5-25.1)           |
|              | 65                           | 1230 | 22.3                  | 9.0 (8.7-9.3)    | 40.4 (38.9-41.9)           | 7.2 (6.8-7.6)              | 32.2 (30.6-33.9)           | 6.1 (5.7-6.5) | 27.4 (25.8-29.0)           |
|              | 70                           | 968  | 18.0                  | 6.1 (5.8-6.4)    | 33.9 (32.1-35.6)           | 6.1 (5.7-6.5)              | 33.9 (31.9-36.0)           | 5.8 (5.4-6.1) | 32.2 (30.2-34.2)           |
|              | 75                           | 784  | 13.9                  | 3.7 (3.4-4.0)    | 26.8 (24.7-29.0)           | 4.8 (4.5-5.2)              | 34.7 (32.2-37.2)           | 5.3 (5.0-5.7) | 38.5 (35.9-41.1)           |
|              | 80                           | 554  | 10.2                  | 2.1 (1.8-2.4)    | 20.4 (17.7-23.2)           | 3.5 (3.2-3.9)              | 34.6 (31.1-38.0)           | 4.6 (4.2-5.0) | 45.0 (41.4-48.6)           |
|              | 85                           | 307  | 7.2                   | 1.0 (0.7-1.3)    | 14.3 (10.3-18.2)           | 2.6 (2.2-3.0)              | 35.9 (30.5-41.3)           | 3.6 (3.2-4.0) | 49.9 (44.3-55.4)           |
| <b>Men</b>   | 50                           | 502  | 31.5                  | 24.9 (24.5-25.2) | 78.9 (77.9-79.9)           | 4.4 (4.1-4.7)              | 13.9 (13.0-14.8)           | 2.3 (2.1-2.5) | 7.2 (6.5-7.9)              |
|              | 55                           | 854  | 27.0                  | 20.9 (20.6-21.1) | 77.1 (76.0-78.2)           | 4.0 (3.7-4.2)              | 14.6 (13.7-15.6)           | 2.2 (2.0-2.4) | 8.3 (7.5-9.0)              |
|              | 60                           | 1151 | 22.8                  | 16.8 (16.5-17.1) | 73.6 (72.3-74.9)           | 3.8 (3.5-4.0)              | 16.6 (15.5-17.7)           | 2.2 (2.0-2.4) | 9.8 (8.9-10.) <sup>7</sup> |
|              | 65                           | 1141 | 18.8                  | 13.1 (12.9-13.4) | 70.0 (68.5-71.5)           | 3.4 (3.2-3.7)              | 18.3 (17.0-19.7)           | 2.2 (2.0-2.4) | 11.7 (10.5-12.8)           |
|              | 70                           | 934  | 15.0                  | 9.8 (9.5-10.1)   | 65.3 (63.4-67.2)           | 3.1 (2.8-3.3)              | 20.6 (18.9-22.2)           | 2.1 (1.9-2.3) | 14.1 (12.6-15.6)           |
|              | 75                           | 786  | 11.5                  | 6.8 (6.5-7.1)    | 59.1 (56.5-61.6)           | 2.6 (2.4-2.9)              | 23.0 (20.8-25.2)           | 2.1 (1.8-2.3) | 17.9 (15.9-20.0)           |
|              | 80                           | 498  | 8.5                   | 4.5 (4.2-4.8)    | 52.8 (49.2-56.4)           | 2.1 (1.8-2.4)              | 24.9 (21.7-28.0)           | 1.9 (1.6-2.2) | 22.3 (19.2-25.4)           |
|              | 85                           | 281  | 6.0                   | 2.7 (2.3-3.0)    | 44.3 (38.5-50.2)           | 1.7 (1.4-2.0)              | 28.3 (23.1-33.6)           | 1.7 (1.3-2.0) | 27.3 (22.1-32.5)           |

<sup>a</sup> Italy, Spain and Greece.
